# Supplementary material
Source: MDPI journal article supplement (https://www.mdpi.com/2073-4395/13/1/191)
Supplement: s1 [file s1]

**Table S1.** Analysis of variance calculated for the vegetative parameters of two cultivars (Hybrid and French) of marigold plants.

| Variables                            | Variation Source    | SS      | DF | MS     | F      | P          |
|--------------------------------------|---------------------|---------|----|--------|--------|------------|
| Plant height                         | Treatment           | 204.92  | 4  | 51.231 | 23.89  | <0.0001*** |
|                                      | Cultivar            | 152.911 | 1  | 152.91 | 71.308 | <0.0001*** |
|                                      | Treatment× Cultivar | 24.227  | 4  | 6.056  | 2.827  | <0.0001*** |
|                                      | Error               | 42.887  | 20 | 2.144  | -      | -          |
| Leaves length                        | Treatment           | 37.459  | 4  | 9.364  | 28.554 | <0.0001*** |
|                                      | Cultivar            | 9.701   | 1  | 9.701  | 29.581 | <0.0001*** |
|                                      | Treatment× Cultivar | 0.473   | 4  | 0.118  | 0.361  | <0.0001*** |
|                                      | Error               | 6.559   | 20 | 0.328  | -      | -          |
| Number of leaves plant <sup>-1</sup> | Treatment           | 1358.59 | 4  | 339.65 | 11.831 | <0.0001*** |
|                                      | Cultivar            | 51.54   | 1  | 51.54  | 1.795  | 0.195      |
|                                      | Treatment× Cultivar | 1.44    | 4  | 0.36   | 0.012  | <0.0001*** |
|                                      | Error               | 574.13  | 20 | 28.71  | -      | -          |
| Stem thickness                       | Treatment           | 38.462  | 4  | 9.615  | 53.718 | <0.0001*** |
|                                      | Cultivar            | 1.365   | 1  | 1.365  | 7.628  | 0.012**    |
|                                      | Treatment× Cultivar | 0.084   | 4  | 0.021  | 0.118  | 0.974      |
|                                      | Error               | 3.580   | 20 | 0.179  | -      | -          |

**Table S2.** Analysis of variance calculated for the floral parameters of two cultivars (Hybrid and French) of marigold plants.

| Variables                                  | Variation Source    | SS       | DF | MS       | F      | P          |
|--------------------------------------------|---------------------|----------|----|----------|--------|------------|
| Bloom<br>flower<br>plant <sup>-1</sup>     | Treatment           | 72.84    | 4  | 18.21    | 94.51  | 0.0008***  |
|                                            | Cultivar            | 1.976    | 1  | 1.976    | 10.25  | 0.004***   |
|                                            | Treatment× Cultivar | 0.225    | 4  | 0.0563   | 0.292  | 0.879      |
|                                            | Error               | 3.853    | 20 | 0.197    | -      | -          |
| Flower<br>height                           | Treatment           | 99.893   | 4  | 24.973   | 23.829 | <0.0001*** |
|                                            | Cultivar            | 2.028    | 1  | 2.028    | 1.935  | 0.179      |
|                                            | Treatment× Cultivar | 0.085    | 4  | 0.023    | 0.02   | 0.999      |
|                                            | Error               | 20.96    | 20 | 1.048    | -      | -          |
| Flower<br>diameter                         | Treatment           | 92.126   | 4  | 23.031   | 99.457 | <0.0001*** |
|                                            | Cultivar            | 4.5008   | 1  | 4.5008   | 19.435 | 0.0002***  |
|                                            | Treatment× Cultivar | 0.34     | 4  | 0.085    | 0.367  | 0.8291     |
|                                            | Error               | 4.631    | 20 | 0.231    | -      | -          |
| Number<br>of petals<br>plant <sup>-1</sup> | Treatment           | 1886.08  | 4  | 471.521  | 20.545 | <0.0001*** |
|                                            | Cultivar            | 1559.523 | 1  | 1559.523 | 67.952 | <0.0001*** |
|                                            | Treatment× Cultivar | 58.105   | 4  | 14.523   | 0.632  | <0.0001*** |
|                                            | Error               | 459.006  | 20 | 22.95    | -      | -          |
| Flower<br>nodes                            | Treatment           | 97.196   | 4  | 24.299   | 12.169 | <0.0001*** |
|                                            | Cultivar            | 15.465   | 1  | 15.465   | 7.745  | 0.011*     |
|                                            | Treatment× Cultivar | 1.541    | 4  | 0.385    | 0.193  | 0.939      |
|                                            | Error               | 39.935   | 20 | 1.996    | -      | -          |
| Fresh<br>weight<br>of flower               | Treatment           | 241.575  | 4  | 60.393   | 59.209 | <0.0001*** |
|                                            | Cultivar            | 29.8     | 1  | 29.8     | 29.216 | <0.0001*** |
|                                            | Treatment× Cultivar | 18.495   | 4  | 4.624    | 4.533  | 0.009***   |
|                                            | Error               | 20.4     | 20 | 1.02     | -      | -          |
| Dry<br>weight<br>of flower                 | Treatment           | 1.301    | 4  | 0.325    | 52.254 | <0.0001*** |
|                                            | Cultivar            | 0.156    | 1  | 0.156    | 25.208 | <0.0001*** |
|                                            | Treatment× Cultivar | 0.093    | 4  | 0.023    | 3.731  | 0.02*      |
|                                            | Error               | 0.124    | 20 | 0.006    | -      | -          |

**Table S3.** Analysis of variance calculated for the total phenolic, carotenoids, and flavonoid contents from flower extraction of marigold (Cvs. Hybrid and French).

| Variables                        | Variation Source    | SS       | DF | MS       | F      | P          |
|----------------------------------|---------------------|----------|----|----------|--------|------------|
| Total phenolic compound contents | Treatment           | 1453.944 | 1  | 1453.944 | 76.02  | <0.0001*** |
|                                  | Cultivar            | 2753.065 | 4  | 688.266  | 35.987 | <0.0001*** |
|                                  | Treatment× Cultivar | 239.329  | 4  | 59.832   | 3.128  | 0.03*      |
|                                  | Error               | 382.506  | 20 | 19.125   | -      | -          |
| Total carotenoids content        | Treatment           | 3.201    | 1  | 3.201    | 6.373  | 0.0201**   |
|                                  | Cultivar            | 98.327   | 4  | 24.582   | 48.935 | <0.0001*** |
|                                  | Treatment× Cultivar | 5.645    | 4  | 1.411    | 2.810  | 0.05*      |
|                                  | Error               | 10.047   | 20 | 0.502    | -      | -          |
| Total flavonoid content          | Treatment           | 0.032    | 1  | 0.032    | 11.96  | 0.002**    |
|                                  | Cultivar            | 0.433    | 4  | 0.108    | 40.422 | <0.0001*** |
|                                  | Treatment× Cultivar | 0.015    | 4  | 0.003    | 1.471  | 0.05*      |
|                                  | Error               | 0.053    | 20 | 0.002    | -      | -          |

**Table S4.** Analysis of variance calculated for the activities of superoxide dismutase, peroxidase, and catalase.

| Variables            | Variation Source    | SS      | DF | MS      | F      | P        |
|----------------------|---------------------|---------|----|---------|--------|----------|
| Superoxide dismutase | Treatment           | 167922  | 1  | 167922  | 4.955  | 0.037*   |
|                      | Cultivar            | 863310  | 4  | 215827  | 0.636  | 0.042*   |
|                      | Treatment× Cultivar | 236232  | 4  | 59058   | 0.174  | 0.05*    |
|                      | Error               | 6777429 | 20 | 338871  | -      | -        |
| Peroxidase           | Treatment           | 1062332 | 1  | 1062332 | 14.726 | 0.001*** |
|                      | Cultivar            | 818337  | 4  | 204584  | 2.836  | 0.051*   |
|                      | Treatment× Cultivar | 134683  | 4  | 33671   | 0.466  | 0.03*    |
|                      | Error               | 1442774 | 20 | 72139   | -      | -        |
| Catalase             | Treatment           | 40266   | 1  | 40266   | 0.72   | 0.403    |
|                      | Cultivar            | 698694  | 4  | 174674  | 3.154  | 0.036*   |
|                      | Treatment× Cultivar | 177861  | 4  | 44465   | 0.803  | 0.04*    |
|                      | Error               | 1107493 | 20 | 55375   | -      | -        |
